# Supplementary material for: Synthesis of novel thiazol-2(3H)-imine derivatives as ergosterol biosynthesis inhibitors, and elucidation of their structures using a 2D NMR technique
Source: Royal Society of Chemistry journal article supplement (doi:10.1039/d3nj02883f), 2023-01-01
Supplement: d3nj02883f1.pdf [file d3nj02883f1.pdf]

**Synthesis of Novel Thiazol-2(3H)-imine Derivatives As Ergosterol Biosynthesis**

**Inhibitors, and Elucidation of Their Structures Using 2D NMR Technique**

**Derya Osmaniye<sup>a,b,\*</sup>, Serkan Levent<sup>a,b</sup>, Begum Nurpelin Saglik<sup>a,b</sup>, Şennur Görgülü<sup>c</sup>,**

**Yusuf Ozkay<sup>a,b</sup>, Zafer Asım Kaplancıklı<sup>a</sup>**

<sup>a</sup>*Department of Pharmaceutical Chemistry, Faculty of Pharmacy, Anadolu University, 26470  
Eskişehir, Turkey*

<sup>b</sup>*Central Research Laboratory (MERLAB), Faculty of Pharmacy, Anadolu University, 26470  
Eskişehir, Turkey*

<sup>c</sup>*Herbal, Pharmaceutical and Scientific Research Application and Research Center, Anadolu  
University, 26470 Eskişehir, Turkey*

\* Corresponding author.

*E-mail address:* dosmaniye@anadolu.edu.tr (D.Osmaniye).

*Tel:* +90-222-3350580/3779 *Fax:* +90-222-3350750.

*Address:* Anadolu University, Faculty of Pharmacy, Department of Pharmaceutical Chemistry,  
26470, Eskişehir, Turkey.

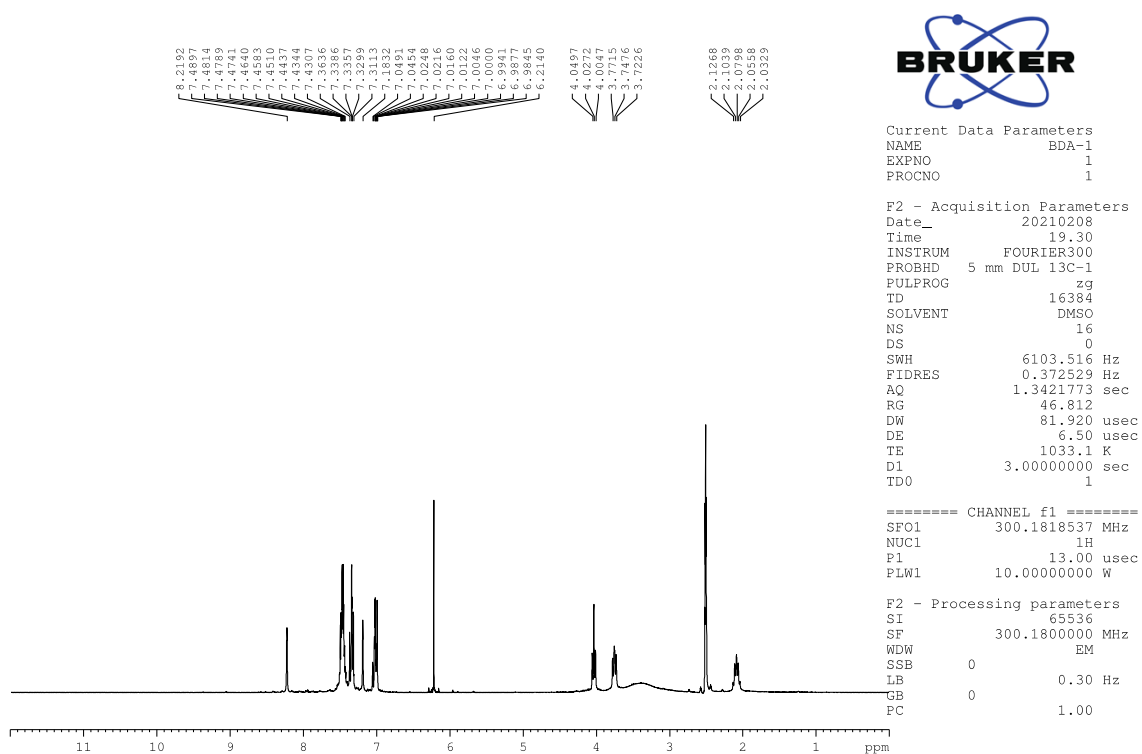

**Figure S1.**  $^1\text{H}$ -NMR spectrum of compound **2a**

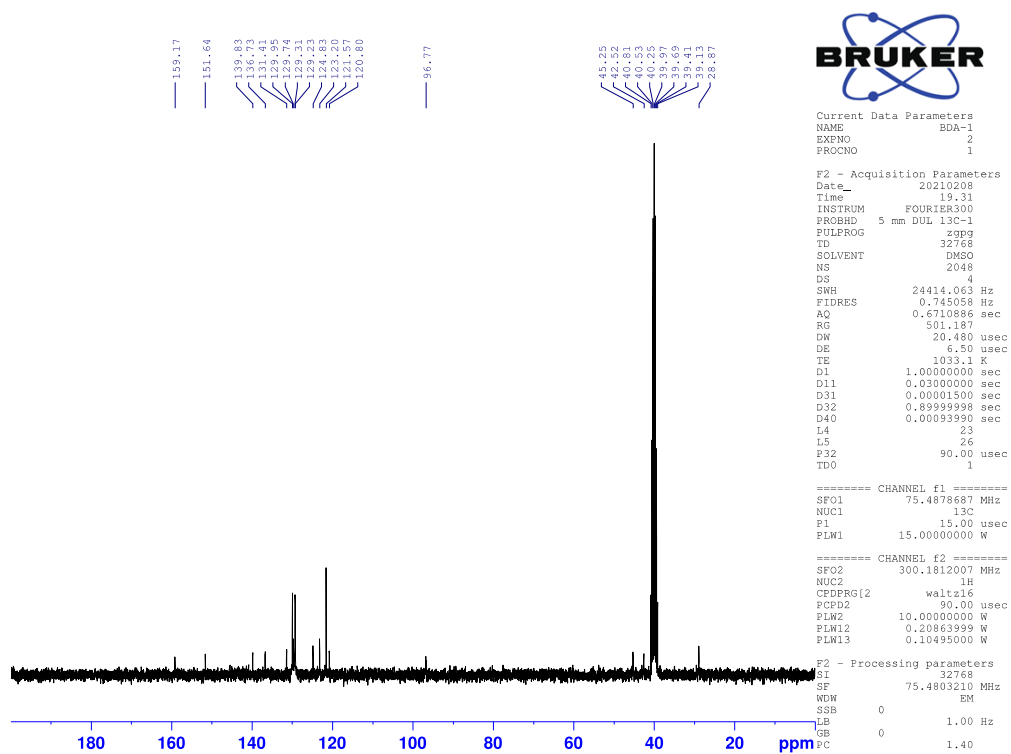

**Figure S2.**  $^{13}\text{C}$ -NMR spectrum of compound **2a**

Data File: C:\LabSolutions\Data\Analiz\derya\BDA-1\_44.lcd

| Elmt | Val. | Min | Max | Use Adduct |
|------|------|-----|-----|------|------|-----|-----|------|------|-----|-----|------|------|-----|-----|------------|
| H    | 1    | 5   | 40  | O    | 2    | 0   | 3   | S    | 2    | 1   | 2   | Ru   | 2    | 0   | 0   | H          |
| C    | 4    | 5   | 35  | F    | 1    | 0   | 0   | Cl   | 1    | 0   | 0   | Pd   | 2    | 0   | 0   |            |
| N    | 3    | 0   | 5   | P    | 3    | 0   | 0   | Br   | 1    | 0   | 0   | I    | 3    | 0   | 0   |            |

Error Margin (ppm): 5

HC Ratio: unlimited

Max Isotopes: 3

MSn Iso RI (%): 10.00

DBE Range: 0.0 - 25.0

Apply N Rule: yes

Isotope RI (%): 1.00

MSn Logic Mode: AND

Electron Ions: both

Use MSn Info: yes

Isotope Res: 9000

Max Results: 150

Event#: 1 MS(E+) Ret. Time : 2.267 Scan# : 341

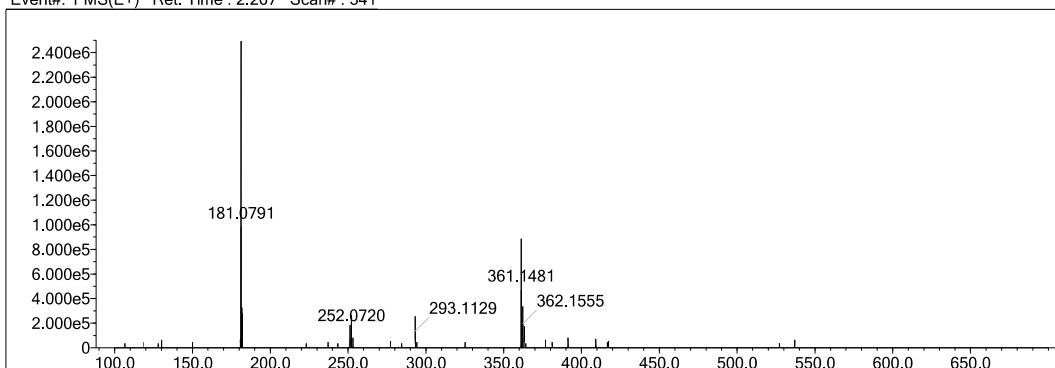

Measured region for 361.1481 m/z

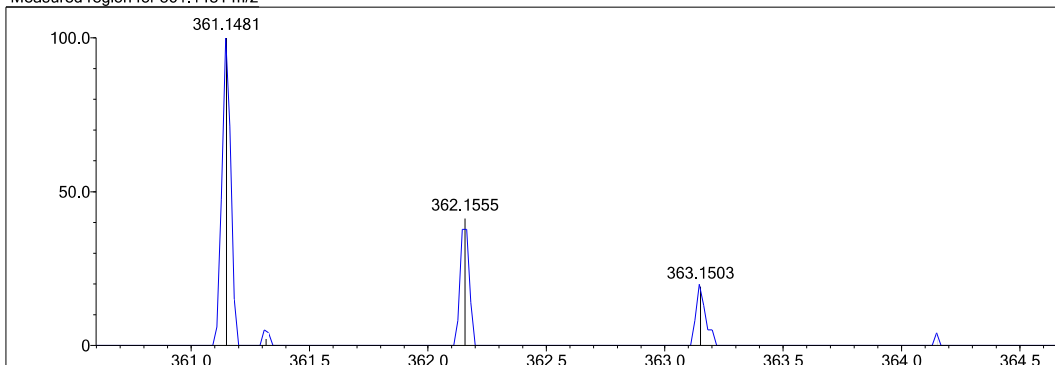

C21 H20 N4 S [M+H]+ : Predicted region for 361.1481 m/z

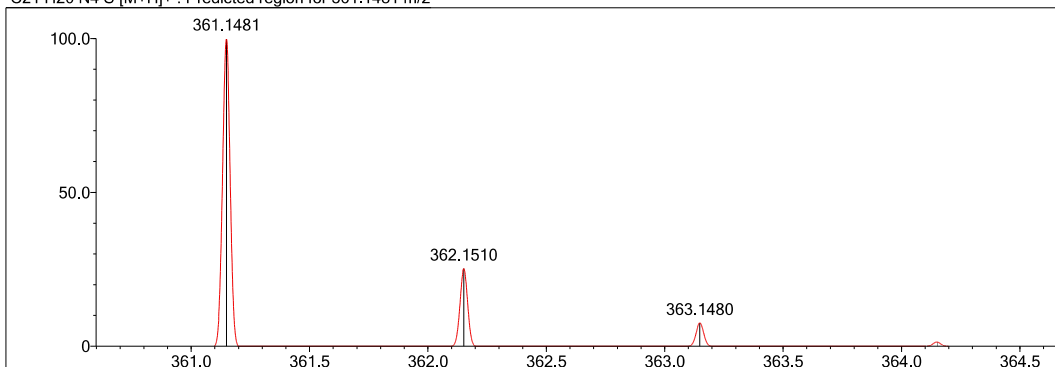

| Rank | Score | Formula (M)  | Ion    | Meas. m/z | Pred. m/z | Df. (mDa) | Df. (ppm) | Iso   | DBE  |
|------|-------|--------------|--------|-----------|-----------|-----------|-----------|-------|------|
| 1    | 55.29 | C21 H20 N4 S | [M+H]+ | 361.1481  | 361.1481  | -0.0      | 0.00      | 55.29 | 14.0 |

Figure S3. HRMS report of compound 2a

# ==== Shimadzu LCMSsolution Analysis Report ====

Acquired by : Admin  
 Sample Name : BDA-1  
 Sample ID :  
 Vial # : 67  
 Injection Volume : 0.5 uL  
 Data File Name : BDA-1\_504.lcd  
 Method File Name : isocratic\_serkan15DKBETÜL.lcm  
 Batch File Name : batch.lcb  
 Report File Name : DefaultLCMS.lcr  
 Data Acquired : 10.08.2023 09:31:09  
 Data Processed : 10.08.2023 11:35:30

## <Chromatogram>

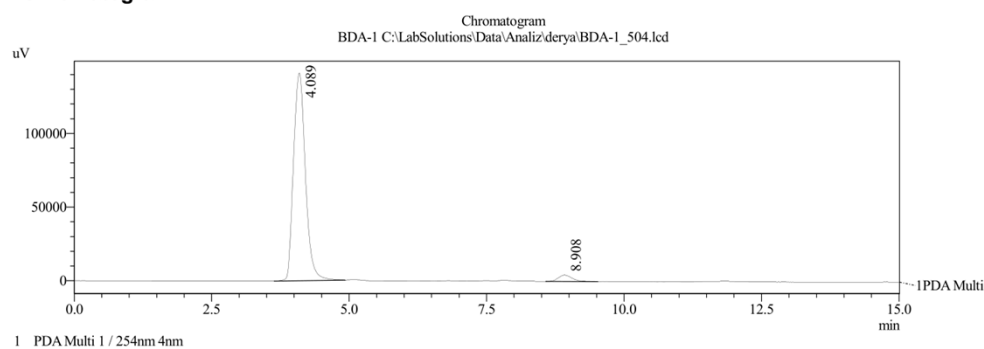

| PeakTable |           |         |        |         |          |
|-----------|-----------|---------|--------|---------|----------|
| Peak#     | Ret. Time | Area    | Height | Area %  | Height % |
| 1         | 4.089     | 2134954 | 141214 | 96.545  | 97.016   |
| 2         | 8.908     | 76404   | 4343   | 3.455   | 2.984    |
| Total     |           | 2211358 | 145557 | 100.000 | 100.000  |

C:\LabSolutions\Data\Analiz\derya\BDA-1\_504.lcd

**Figure S4.** HPLC report of compound **2a**

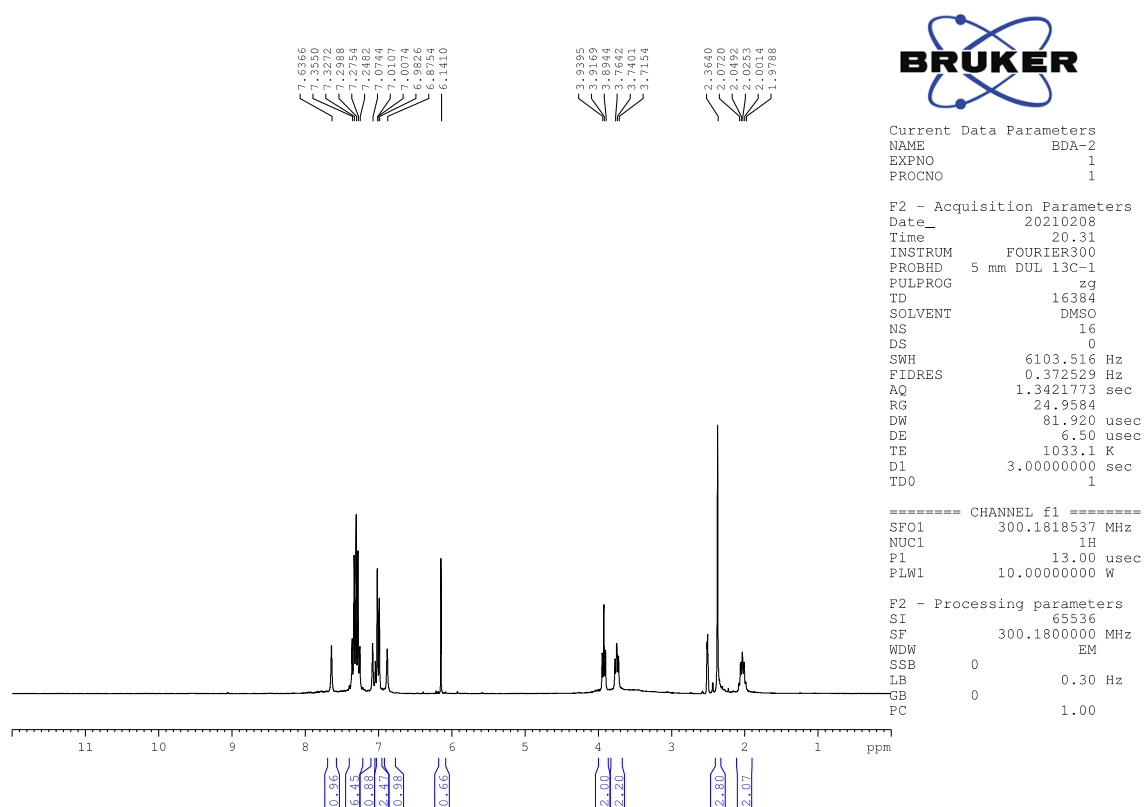

Figure S5.  $^1\text{H}$ -NMR spectrum of compound **2b**

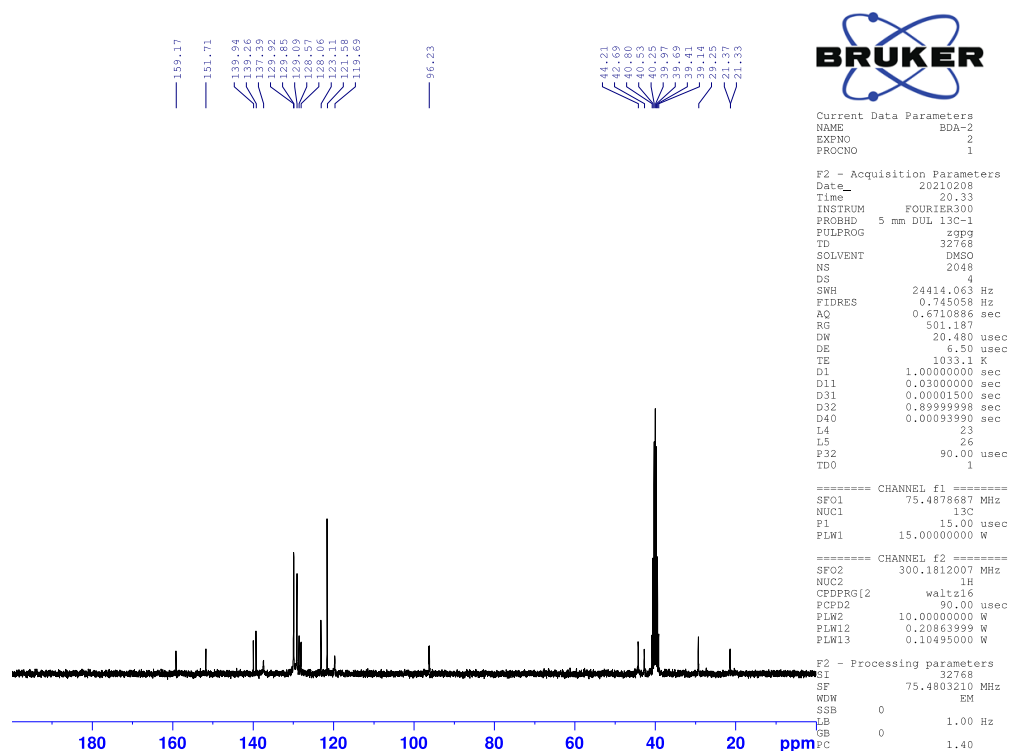

Figure S6.  $^{13}\text{C}$ -NMR spectrum of compound **2b**

Data File: C:\LabSolutions\Data\Analiz\derya\BDA-2\_45.lcd

| Elmt | Val. | Min | Max | Use Adduct |
|------|------|-----|-----|------|------|-----|-----|------|------|-----|-----|------|------|-----|-----|------------|
| H    | 1    | 5   | 40  | O    | 2    | 0   | 3   | S    | 2    | 1   | 2   | Ru   | 2    | 0   | 0   | H          |
| C    | 4    | 5   | 35  | F    | 1    | 0   | 0   | Cl   | 1    | 0   | 0   | Pd   | 2    | 0   | 0   |            |
| N    | 3    | 0   | 5   | P    | 3    | 0   | 0   | Br   | 1    | 0   | 0   | I    | 3    | 0   | 0   |            |

Error Margin (ppm): 5

DBE Range: 0.0 - 25.0

Electron Ions: both

HC Ratio: unlimited

Apply N Rule: yes

Use MSn Info: yes

Max Isotopes: 3

Isotope RI (%): 1.00

Isotope Res: 9000

MSn Iso RI (%): 10.00

MSn Logic Mode: AND

Max Results: 150

Event#: 1 MS(E+) Ret. Time : 2.427 Scan# : 365

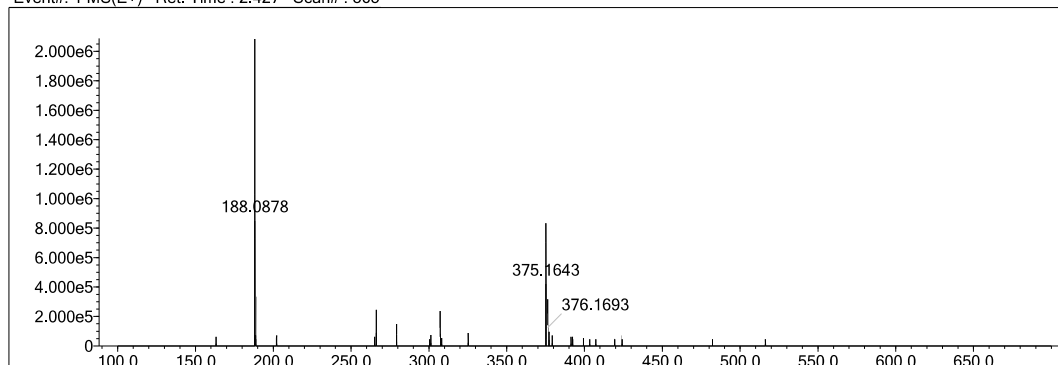

Measured region for 375.1643 m/z

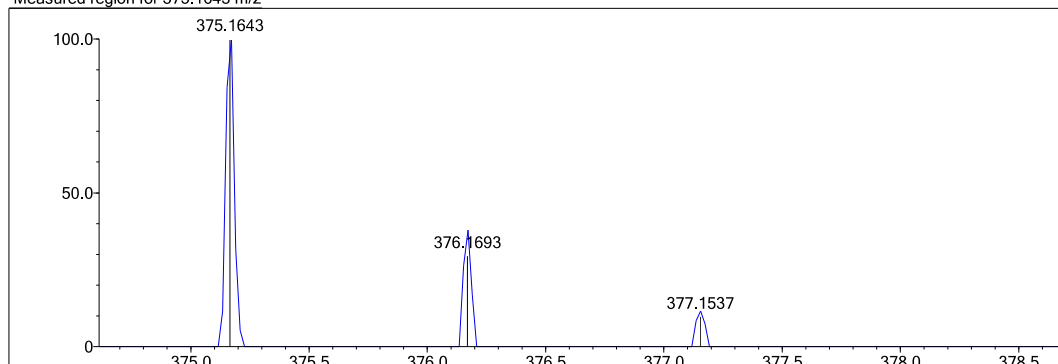C22 H22 N4 S [M+H]<sup>+</sup> : Predicted region for 375.1638 m/z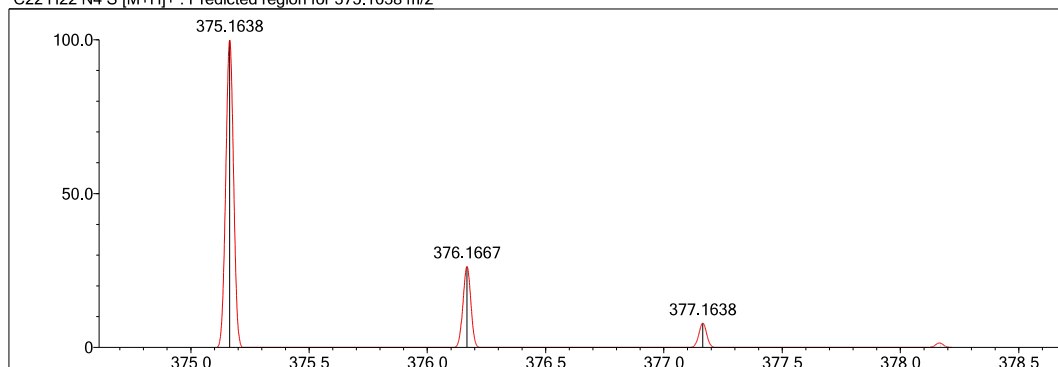

| Rank | Score | Formula (M)  | Ion                | Meas. m/z | Pred. m/z | Df. (mDa) | Df. (ppm) | Iso   | DBE  |
|------|-------|--------------|--------------------|-----------|-----------|-----------|-----------|-------|------|
| 1    | 44.31 | C22 H22 N4 S | [M+H] <sup>+</sup> | 375.1643  | 375.1638  | 0.5       | 1.33      | 44.68 | 14.0 |

Figure S7. HRMS report of compound **2b**

# ==== Shimadzu LCMSSolution Analysis Report ====

Acquired by : Admin  
 Sample Name : BDA-2  
 Sample ID :  
 Vial # : 68  
 Injection Volume : 0.5 uL  
 Data File Name : BDA-2\_1.lcd  
 Method File Name : isocratic\_serkan15DKBETÜL.lcm  
 Batch File Name : batch.lcb  
 Report File Name : DefaultLCMS.lcr  
 Data Acquired : 10.08.2023 09:46:37  
 Data Processed : 10.08.2023 11:43:17

## <Chromatogram>

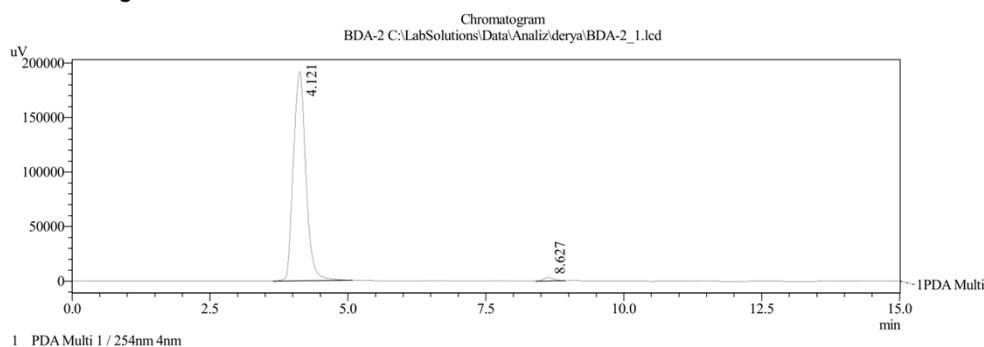

| PeakTable |           |         |        |         |          |
|-----------|-----------|---------|--------|---------|----------|
| Peak#     | Ret. Time | Area    | Height | Area %  | Height % |
| 1         | 4.121     | 3031401 | 192104 | 98.717  | 98.478   |
| 2         | 8.627     | 39407   | 2969   | 1.283   | 1.522    |
| Total     |           | 3070808 | 195073 | 100.000 | 100.000  |

C:\LabSolutions\Data\Analiz\derya\BDA-2\_1.lcd

**Figure S8. HPLC report of compound 2b**

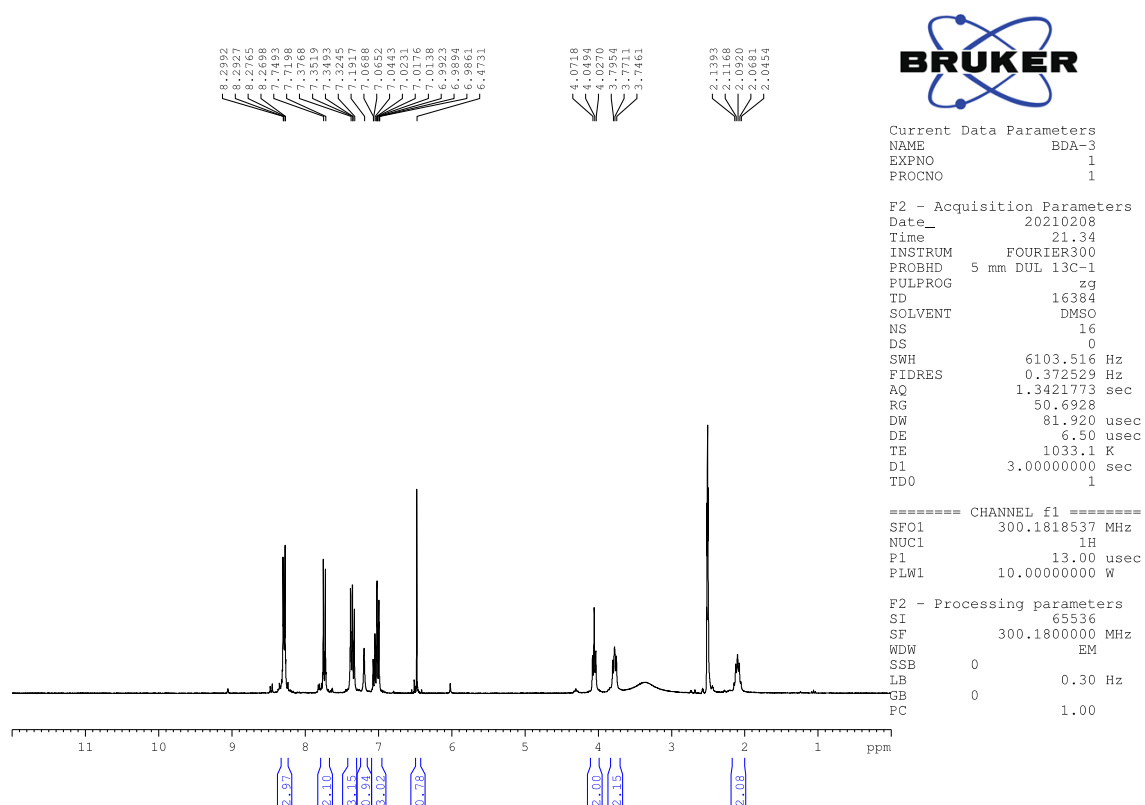

Figure S9.  $^1\text{H}$ -NMR spectrum of compound **2c**

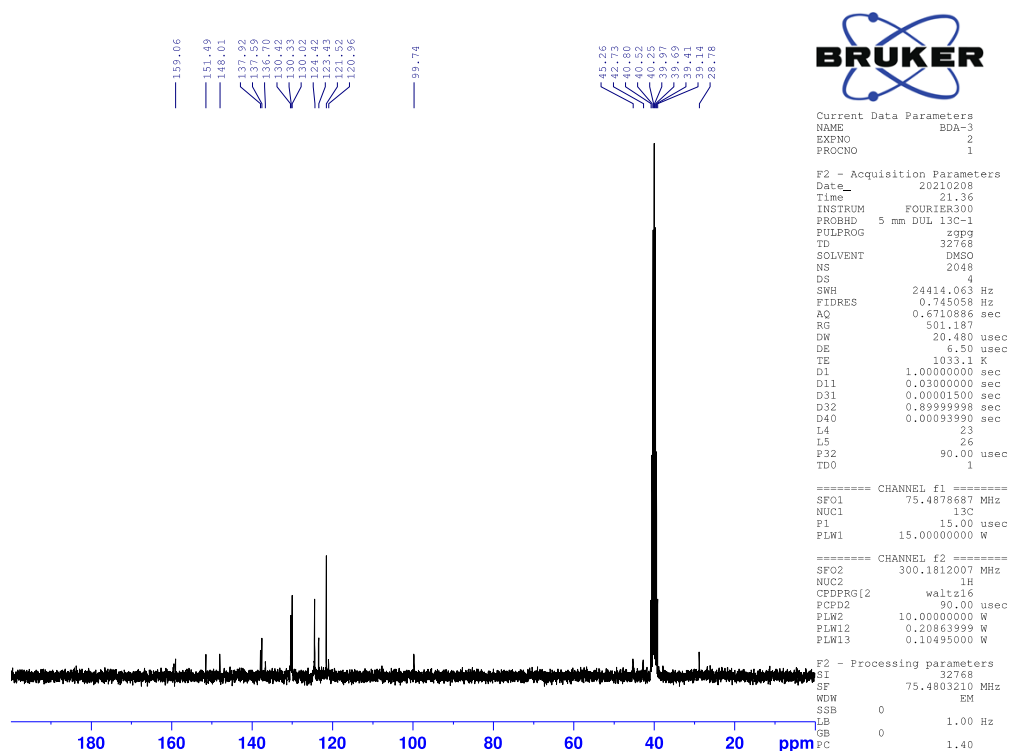

Figure S10.  $^{13}\text{C}$ -NMR spectrum of compound **2c**



Data File: C:\LabSolutions\Data\Analiz\derya\BDA-3\_46.lcd

| Elmt | Val. | Min | Max | Use Adduct |
|------|------|-----|-----|------|------|-----|-----|------|------|-----|-----|------|------|-----|-----|------------|
| H    | 1    | 5   | 40  | O    | 2    | 0   | 3   | S    | 2    | 1   | 2   | Ru   | 2    | 0   | 0   | H          |
| C    | 4    | 5   | 35  | F    | 1    | 0   | 0   | Cl   | 1    | 0   | 0   | Pd   | 2    | 0   | 0   |            |
| N    | 3    | 0   | 5   | P    | 3    | 0   | 0   | Br   | 1    | 0   | 0   | I    | 3    | 0   | 0   |            |

Error Margin (ppm): 5

DBE Range: 0.0 - 25.0

Electron Ions: both

HC Ratio: unlimited

Apply N Rule: yes

Use MSn Info: yes

Max Isotopes: 3

Isotope RI (%): 1.00

Isotope Res: 9000

MSn Iso RI (%): 10.00

MSn Logic Mode: AND

Max Results: 150

Event#: 1 MS(E+) Ret. Time : 2.427 Scan# : 365

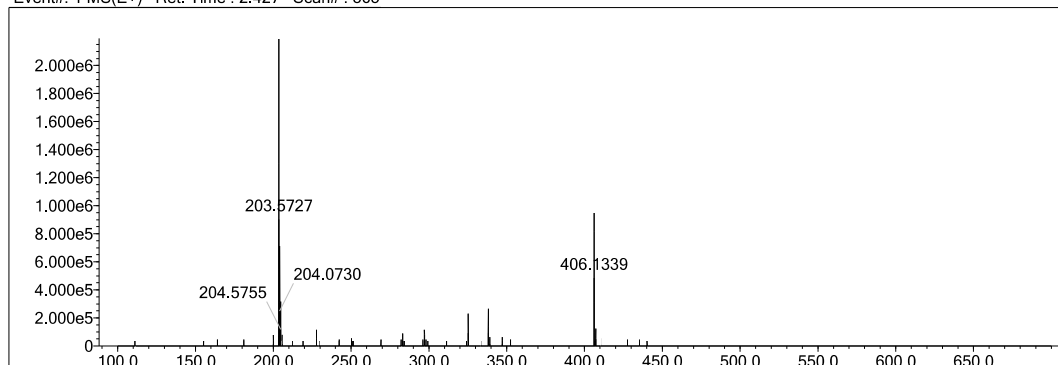

Measured region for 406.1339 m/z

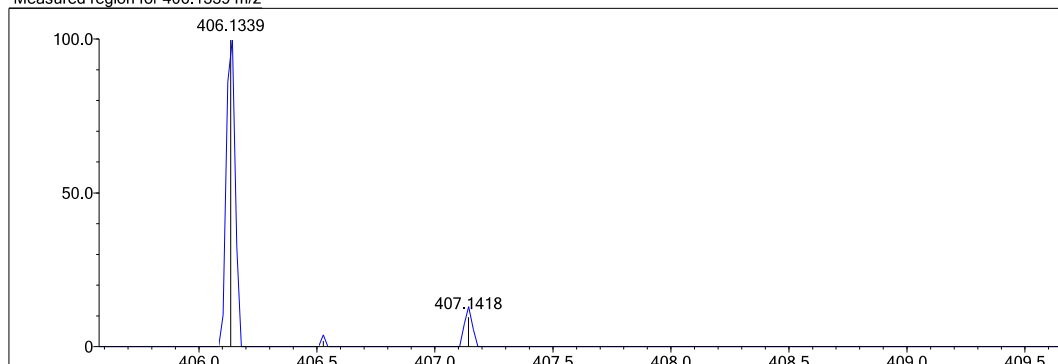

C21 H19 N5 O2 S [M+H]+ : Predicted region for 406.1332 m/z

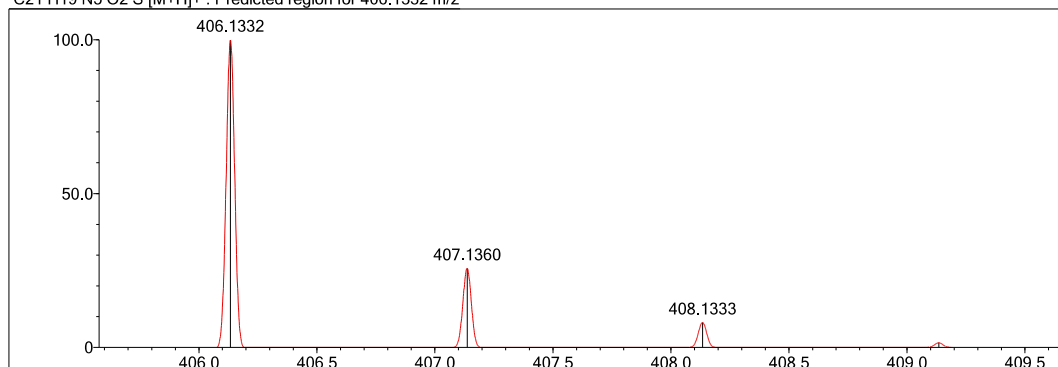

| Rank | Score | Formula (M)     | Ion                | Meas. m/z | Pred. m/z | Df. (mDa) | Df. (ppm) | Iso  | DBE  |
|------|-------|-----------------|--------------------|-----------|-----------|-----------|-----------|------|------|
| 1    | 0.00  | C21 H19 N5 O2 S | [M+H] <sup>+</sup> | 406.1339  | 406.1332  | 0.7       | 1.72      | 0.00 | 15.0 |

Figure S11. HRMS report of compound 2c

# ==== Shimadzu LCMSsolution Analysis Report ====

Acquired by : Admin  
 Sample Name : BDA-3  
 Sample ID :  
 Vial # : 69  
 Injection Volume : 0.5 uL  
 Data File Name : BDA-3\_2.lcd  
 Method File Name : isocratic\_serkan15DKBETÜL.lcm  
 Batch File Name : batch.lcb  
 Report File Name : DefaultLCMS.lcr  
 Data Acquired : 10.08.2023 10:02:06  
 Data Processed : 10.08.2023 11:43:57

## <Chromatogram>

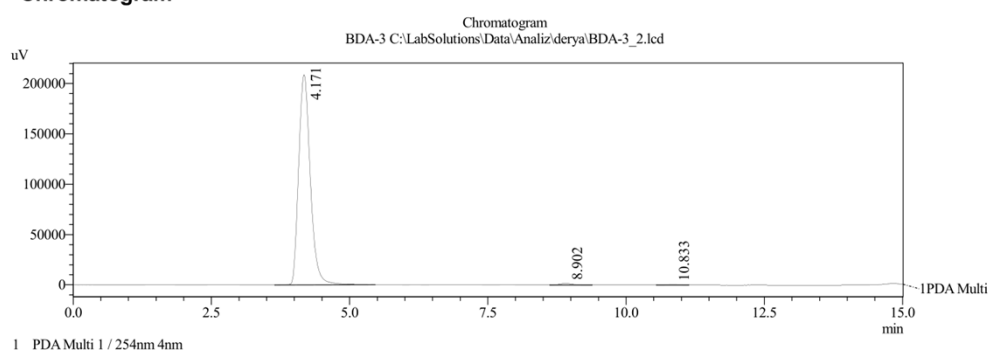

| PeakTable |           |         |        |         |          |
|-----------|-----------|---------|--------|---------|----------|
| Peak#     | Ret. Time | Area    | Height | Area %  | Height % |
| 1         | 4.171     | 3066285 | 208703 | 98.931  | 98.988   |
| 2         | 8.902     | 24136   | 1558   | 0.779   | 0.739    |
| 3         | 10.833    | 9007    | 576    | 0.291   | 0.273    |
| Total     |           | 3099429 | 210837 | 100.000 | 100.000  |

C:\LabSolutions\Data\Analiz\derya\BDA-3\_2.lcd

**Figure S12.** HPLC report of compound **2c**

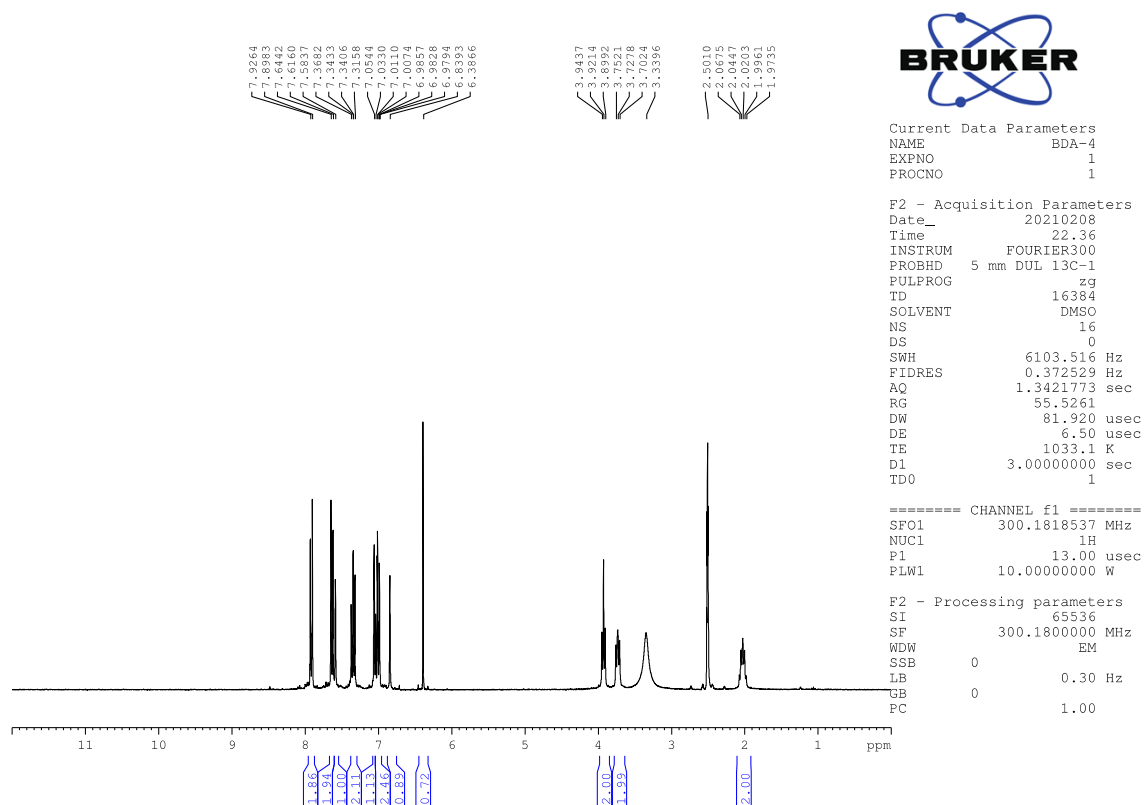

Figure S13.  $^1\text{H}$ -NMR spectrum of compound **2d**

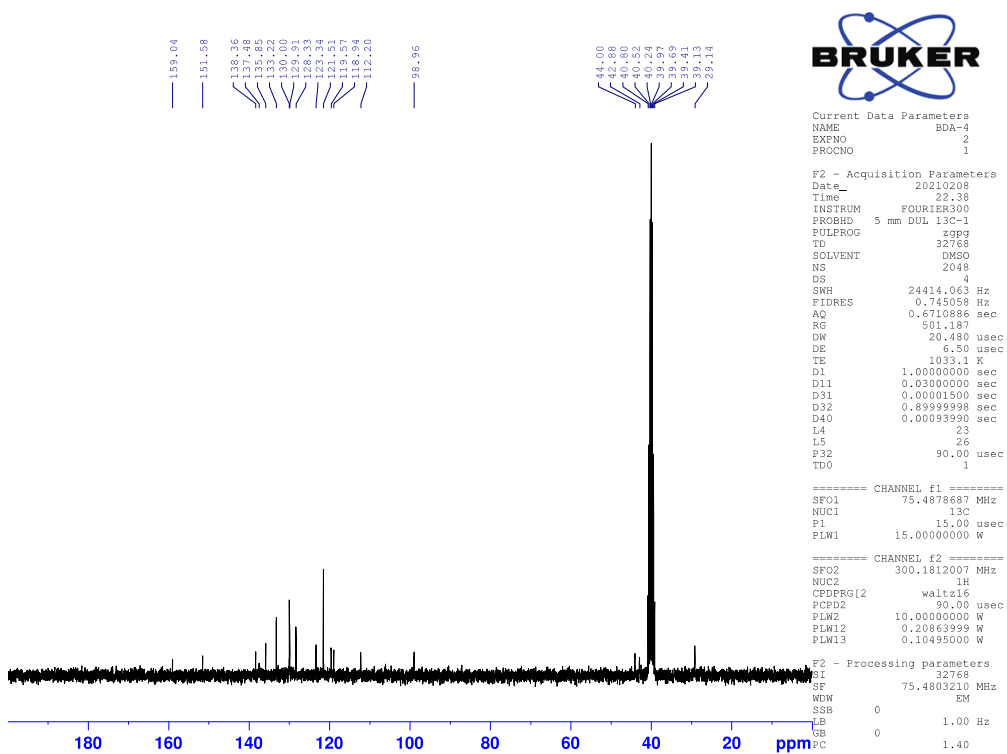

Figure S14.  $^{13}\text{C}$ -NMR spectrum of compound **2d**

Data File: C:\LabSolutions\Data\Analiz\derya\BDA-4\_47.lcd

| Elmt | Val. | Min | Max | Use Adduct |
|------|------|-----|-----|------|------|-----|-----|------|------|-----|-----|------|------|-----|-----|------------|
| H    | 1    | 5   | 40  | O    | 2    | 0   | 3   | S    | 2    | 1   | 2   | Ru   | 2    | 0   | 0   | H          |
| C    | 4    | 5   | 35  | F    | 1    | 0   | 0   | Cl   | 1    | 0   | 0   | Pd   | 2    | 0   | 0   |            |
| N    | 3    | 0   | 5   | P    | 3    | 0   | 0   | Br   | 1    | 0   | 0   | I    | 3    | 0   | 0   |            |

Error Margin (ppm): 5

DBE Range: 0.0 - 25.0

Electron Ions: both

HC Ratio: unlimited

Apply N Rule: yes

Use MSn Info: yes

Max Isotopes: 3

Isotope RI (%): 1.00

Isotope Res: 9000

MSn Iso RI (%): 10.00

MSn Logic Mode: AND

Max Results: 150

Event#: 1 MS(E+) Ret. Time : 2.173 Scan# : 327

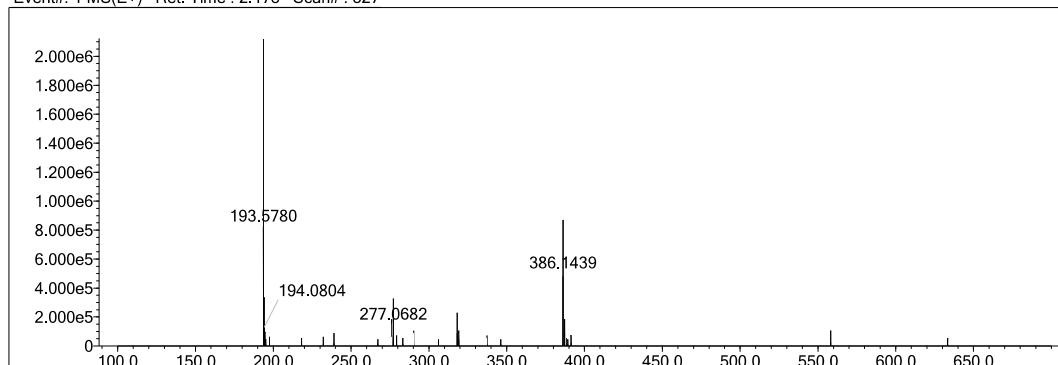

Measured region for 386.1439 m/z

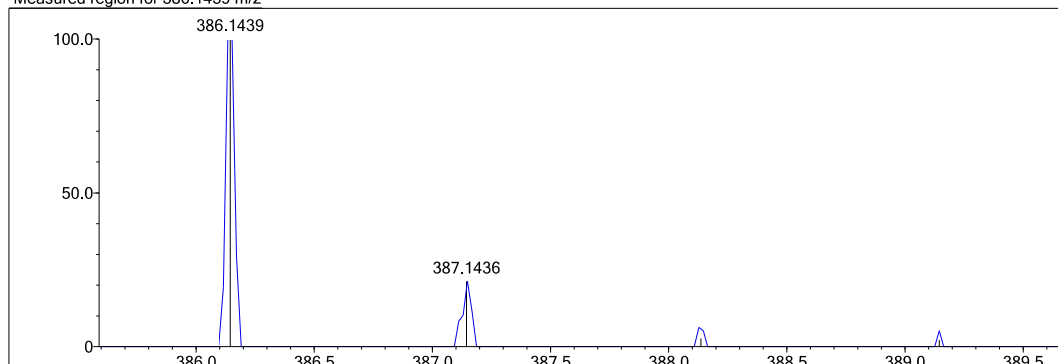C22 H19 N5 S [M+H]<sup>+</sup> : Predicted region for 386.1434 m/z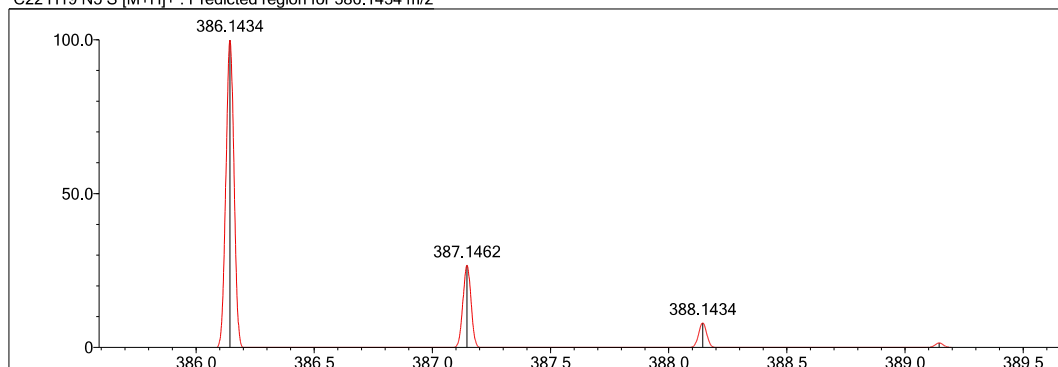

| Rank | Score | Formula (M)  | Ion                | Meas. m/z | Pred. m/z | Df. (mDa) | Df. (ppm) | Iso   | DBE  |
|------|-------|--------------|--------------------|-----------|-----------|-----------|-----------|-------|------|
| 1    | 60.01 | C22 H19 N5 S | [M+H] <sup>+</sup> | 386.1439  | 386.1434  | 0.5       | 1.29      | 60.45 | 16.0 |

Figure S15. HRMS report of compound **2d**

# ==== Shimadzu LCMSSolution Analysis Report ====

Acquired by : Admin  
 Sample Name : BDA-4  
 Sample ID :  
 Vial # : 70  
 Injection Volume : 0.5 uL  
 Data File Name : BDA-4\_3.lcd  
 Method File Name : isocratic\_serkan15DKBETÜL.lcm  
 Batch File Name : batch.lcb  
 Report File Name : DefaultLCMS.lcr  
 Data Acquired : 10.08.2023 10:17:35  
 Data Processed : 10.08.2023 11:44:50

## <Chromatogram>

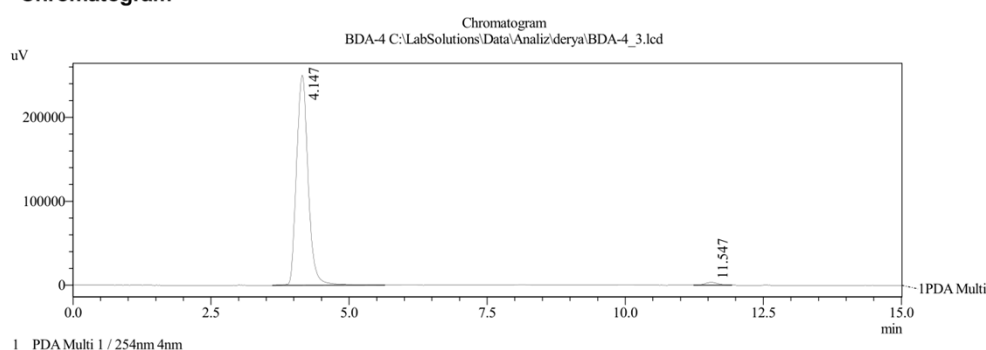

| PeakTable |           |         |        |         |          |
|-----------|-----------|---------|--------|---------|----------|
| Peak#     | Ret. Time | Area    | Height | Area %  | Height % |
| 1         | 4.147     | 3658634 | 250390 | 98.558  | 98.656   |
| 2         | 11.547    | 53520   | 3411   | 1.442   | 1.344    |
| Total     |           | 3712155 | 253802 | 100.000 | 100.000  |

C:\LabSolutions\Data\Analiz\derya\BDA-4\_3.lcd

**Figure S16.** HPLC report of compound **2d**

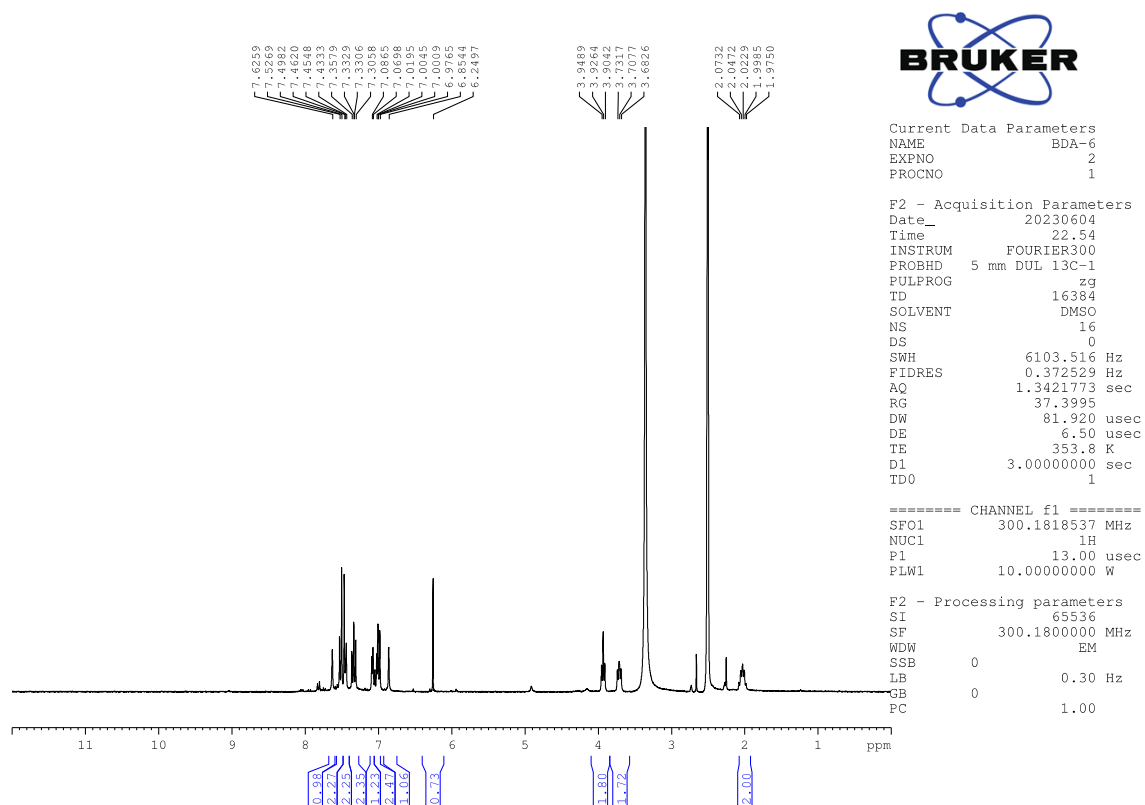

Figure S17.  $^1\text{H}$ -NMR spectrum of compound **2e**

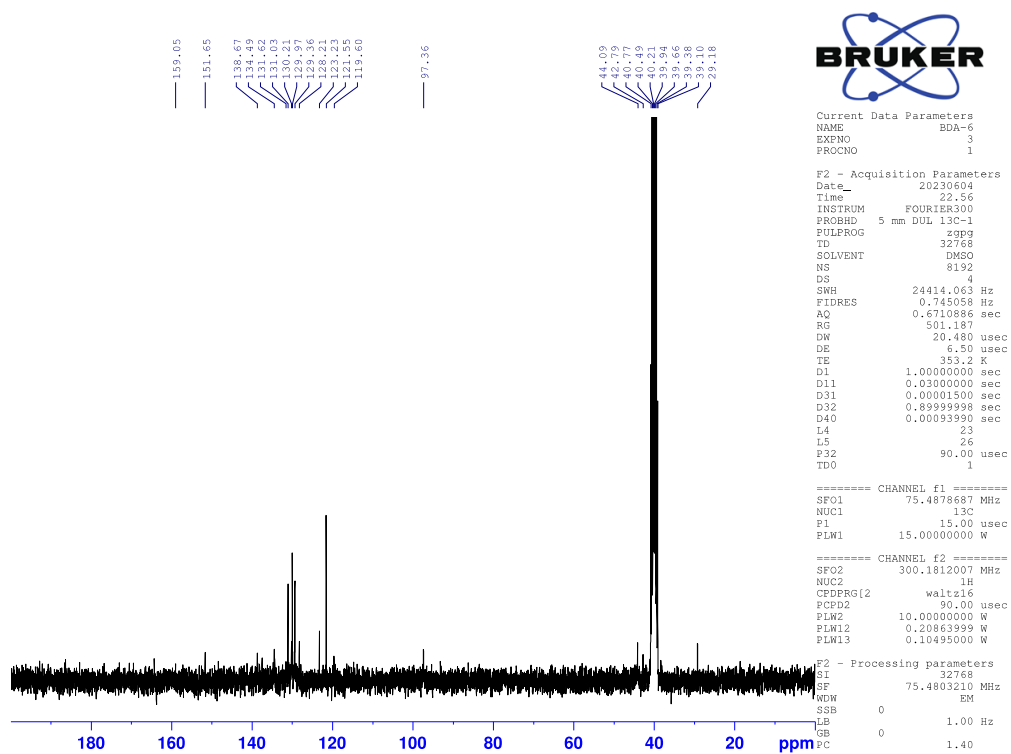

Figure S18.  $^{13}\text{C}$ -NMR spectrum of compound **2e**

Data File: C:\LabSolutions\Data\Analiz\derya\BDA-6\_48.lcd

| Elmt | Val. | Min | Max | Use Adduct |
|------|------|-----|-----|------|------|-----|-----|------|------|-----|-----|------|------|-----|-----|------------|
| H    | 1    | 5   | 40  | O    | 2    | 0   | 3   | S    | 2    | 1   | 1   | Ru   | 2    | 0   | 0   | H          |
| C    | 4    | 5   | 35  | F    | 1    | 0   | 0   | Cl   | 1    | 1   | 1   | Pd   | 2    | 0   | 0   |            |
| N    | 3    | 0   | 5   | P    | 3    | 0   | 0   | Br   | 1    | 0   | 0   | I    | 3    | 0   | 0   |            |

Error Margin (ppm): 5

DBE Range: 0.0 - 25.0

Electron Ions: both

HC Ratio: unlimited

Apply N Rule: yes

Use MSn Info: yes

Max Isotopes: 3

Isotope RI (%): 1.00

Isotope Res: 9000

MSn Iso RI (%): 10.00

MSn Logic Mode: AND

Max Results: 150

Event#: 1 MS(E+) Ret. Time : 2.333 Scan# : 351

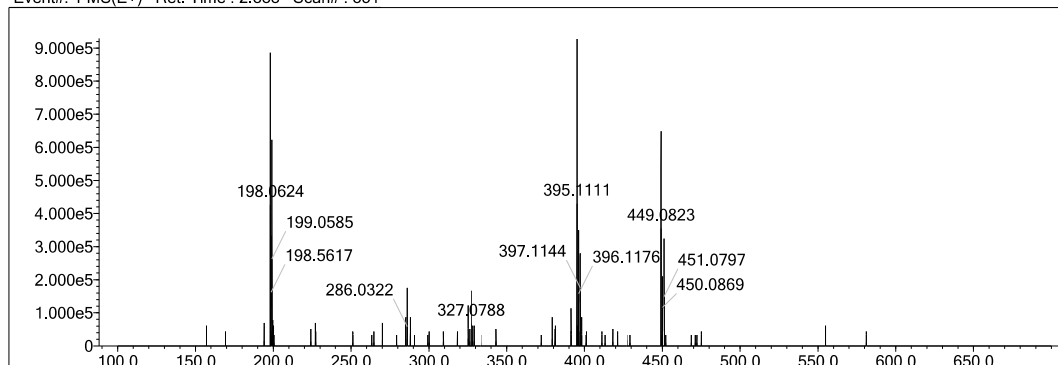

Measured region for 395.1111 m/z

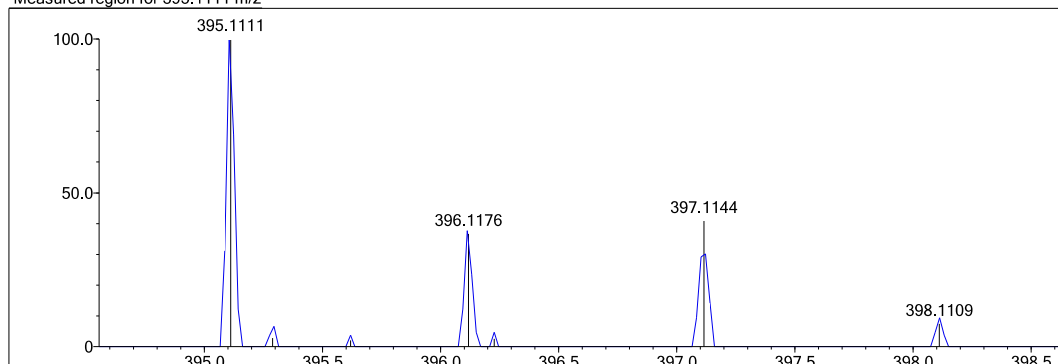C21 H19 N4 S Cl [M+H]<sup>+</sup> : Predicted region for 395.1092 m/z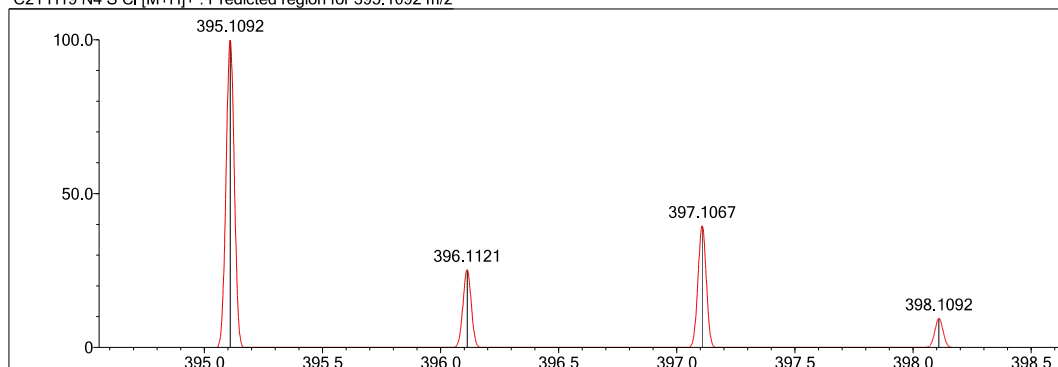

| Rank | Score | Formula (M)     | Ion                | Meas. m/z | Pred. m/z | Df. (mDa) | Df. (ppm) | Iso   | DBE  |
|------|-------|-----------------|--------------------|-----------|-----------|-----------|-----------|-------|------|
| 1    | 52.48 | C21 H19 N4 S Cl | [M+H] <sup>+</sup> | 395.1111  | 395.1092  | 1.9       | 4.81      | 58.01 | 14.0 |

Figure S19. HRMS report of compound 2e

# ==== Shimadzu LCMSSolution Analysis Report ====

Acquired by : Admin  
 Sample Name : BDA-6  
 Sample ID :  
 Vial # : 71  
 Injection Volume : 0.5 uL  
 Data File Name : BDA-6\_4.lcd  
 Method File Name : isocratic\_serkan15DKBETÜL.lcm  
 Batch File Name : batch.lcb  
 Report File Name : DefaultLCMS.lcr  
 Data Acquired : 10.08.2023 10:33:04  
 Data Processed : 10.08.2023 11:48:05

## <Chromatogram>

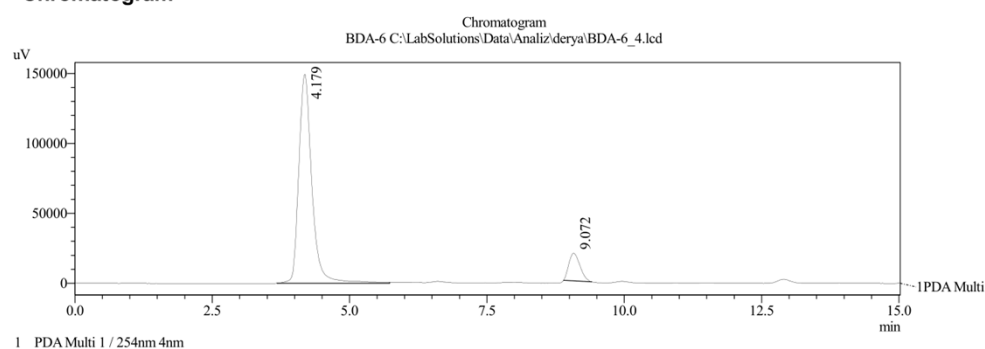

| PeakTable |           |         |        |         |          |
|-----------|-----------|---------|--------|---------|----------|
| Peak#     | Ret. Time | Area    | Height | Area %  | Height % |
| 1         | 4.179     | 2487913 | 149461 | 90.001  | 88.384   |
| 2         | 9.072     | 276397  | 19644  | 9.999   | 11.616   |
| Total     |           | 2764309 | 169105 | 100.000 | 100.000  |

C:\LabSolutions\Data\Analiz\derya\BDA-6\_4.lcd

**Figure S20.** HPLC report of compound **2e**



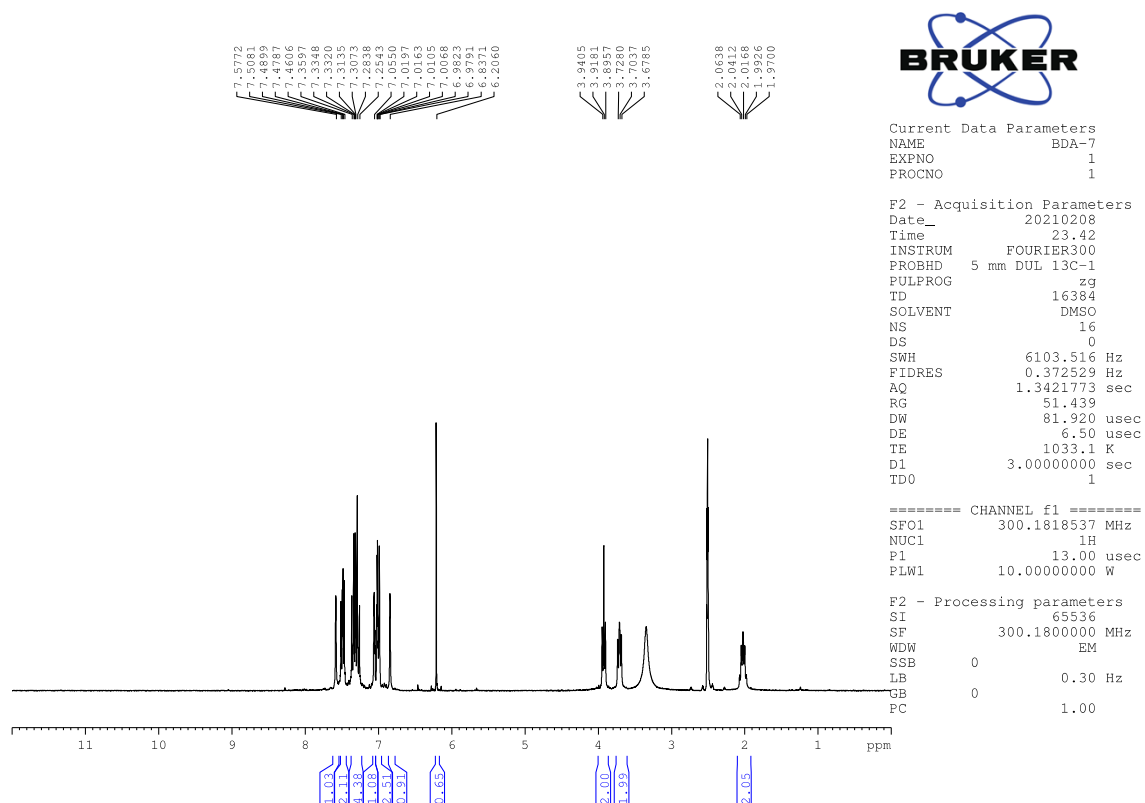

**Figure S21.**  $^1\text{H}$ -NMR spectrum of compound **2f**

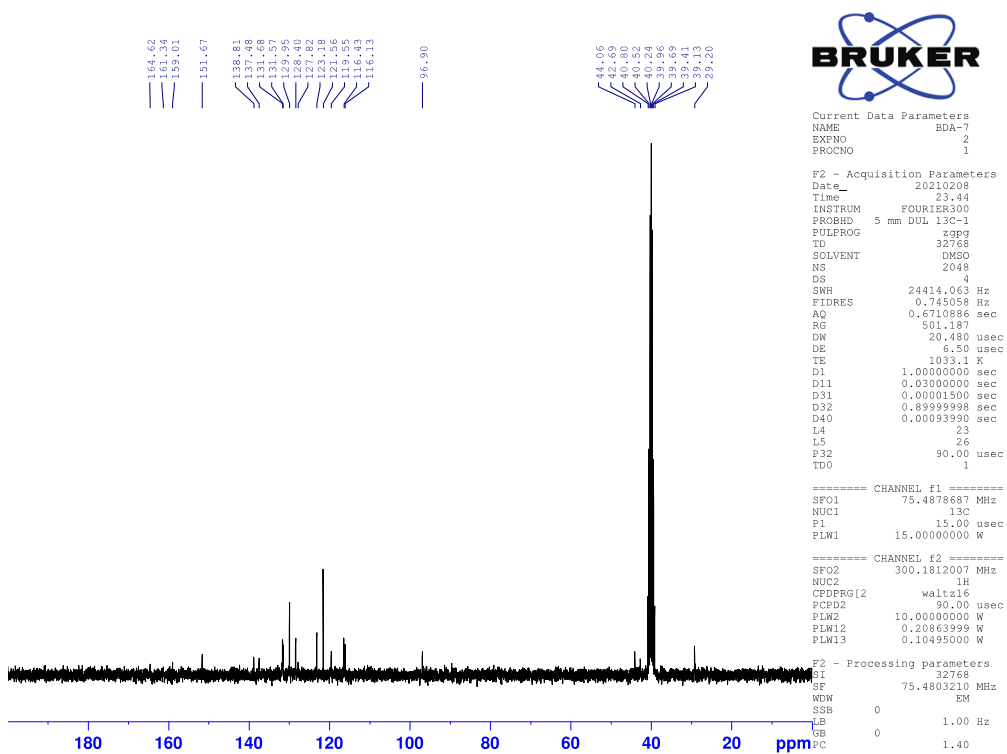

Data File: C:\LabSolutions\Data\Analiz\derya\BDA-7\_49.lcd

| Elmt | Val. | Min | Max | Use Adduct |
|------|------|-----|-----|------|------|-----|-----|------|------|-----|-----|------|------|-----|-----|------------|
| H    | 1    | 5   | 40  | O    | 2    | 0   | 3   | S    | 2    | 1   | 1   | Ru   | 2    | 0   | 0   | H          |
| C    | 4    | 5   | 35  | F    | 1    | 1   | 1   | Cl   | 1    | 0   | 0   | Pd   | 2    | 0   | 0   |            |
| N    | 3    | 0   | 5   | P    | 3    | 0   | 0   | Br   | 1    | 0   | 0   | I    | 3    | 0   | 0   |            |

Error Margin (ppm): 5

DBE Range: 0.0 - 25.0

Electron Ions: both

HC Ratio: unlimited

Apply N Rule: yes

Use MSn Info: yes

Max Isotopes: 3

Isotope RI (%): 1.00

Isotope Res: 9000

MSn Iso RI (%): 10.00

MSn Logic Mode: AND

Max Results: 150

Event#: 1 MS(E+) Ret. Time : 2.707 Scan# : 407

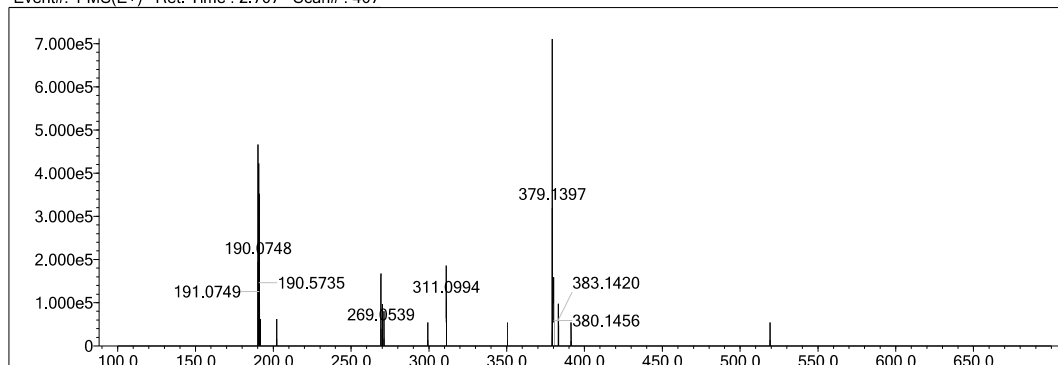

Measured region for 379.1397 m/z

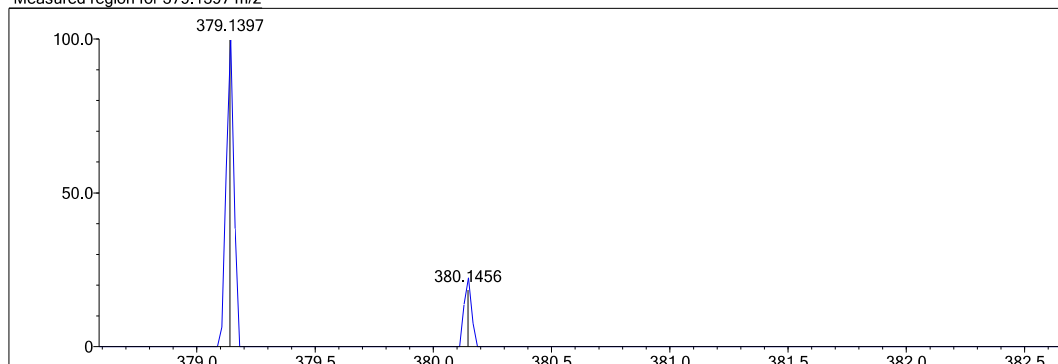

C21 H19 N4 F S [M+H]+ : Predicted region for 379.1387 m/z

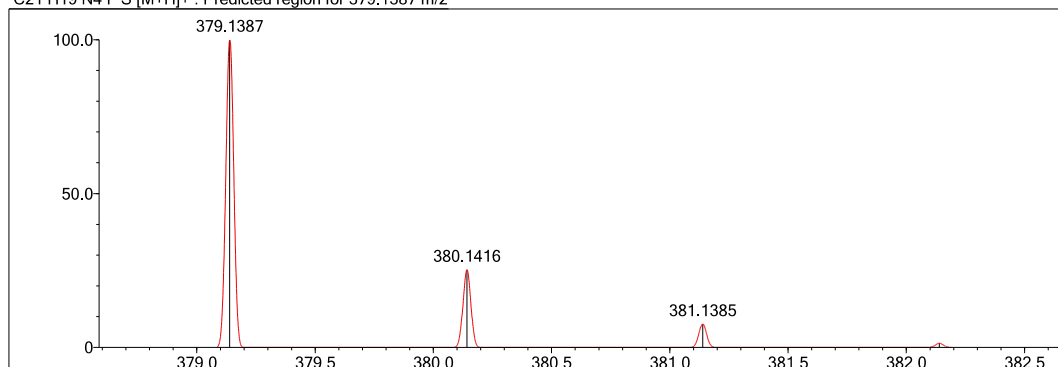

| Rank | Score | Formula (M)    | Ion    | Meas. m/z | Pred. m/z | Df. (mDa) | Df. (ppm) | Iso  | DBE  |
|------|-------|----------------|--------|-----------|-----------|-----------|-----------|------|------|
| 1    | 0.00  | C21 H19 N4 F S | [M+H]+ | 379.1397  | 379.1387  | 1.0       | 2.64      | 0.00 | 14.0 |

Figure S23. HRMS report of compound 2f

# ==== Shimadzu LCMSSolution Analysis Report ====

Acquired by : Admin  
 Sample Name : BDA-7  
 Sample ID :  
 Vial # : 72  
 Injection Volume : 0.5 uL  
 Data File Name : BDA-7\_5.lcd  
 Method File Name : isocratic\_serkan15DKBETÜL.lcm  
 Batch File Name : batch.lcb  
 Report File Name : DefaultLCMS.lcr  
 Data Acquired : 10.08.2023 10:48:34  
 Data Processed : 10.08.2023 11:48:48

## <Chromatogram>

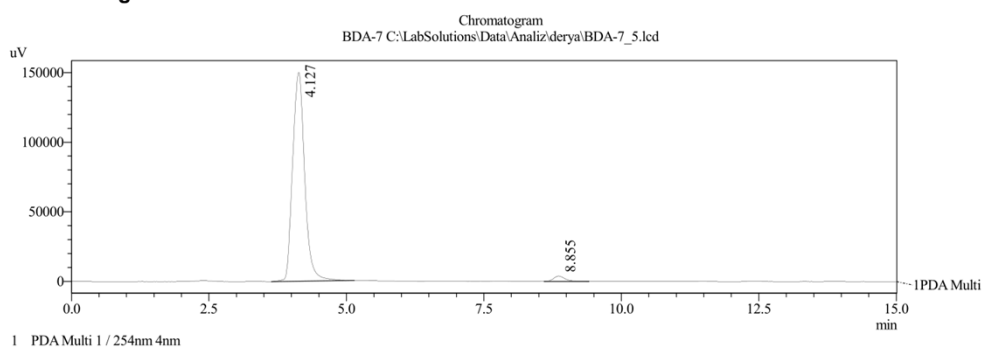

| PeakTable |           |         |        |         |          |
|-----------|-----------|---------|--------|---------|----------|
| Peak#     | Ret. Time | Area    | Height | Area %  | Height % |
| 1         | 4.127     | 2295836 | 150088 | 97.709  | 97.573   |
| 2         | 8.855     | 53840   | 3734   | 2.291   | 2.427    |
| Total     |           | 2349676 | 153822 | 100.000 | 100.000  |

C:\LabSolutions\Data\Analiz\derya\BDA-7\_5.lcd

**Figure S24.** HPLC report of compound **2f**

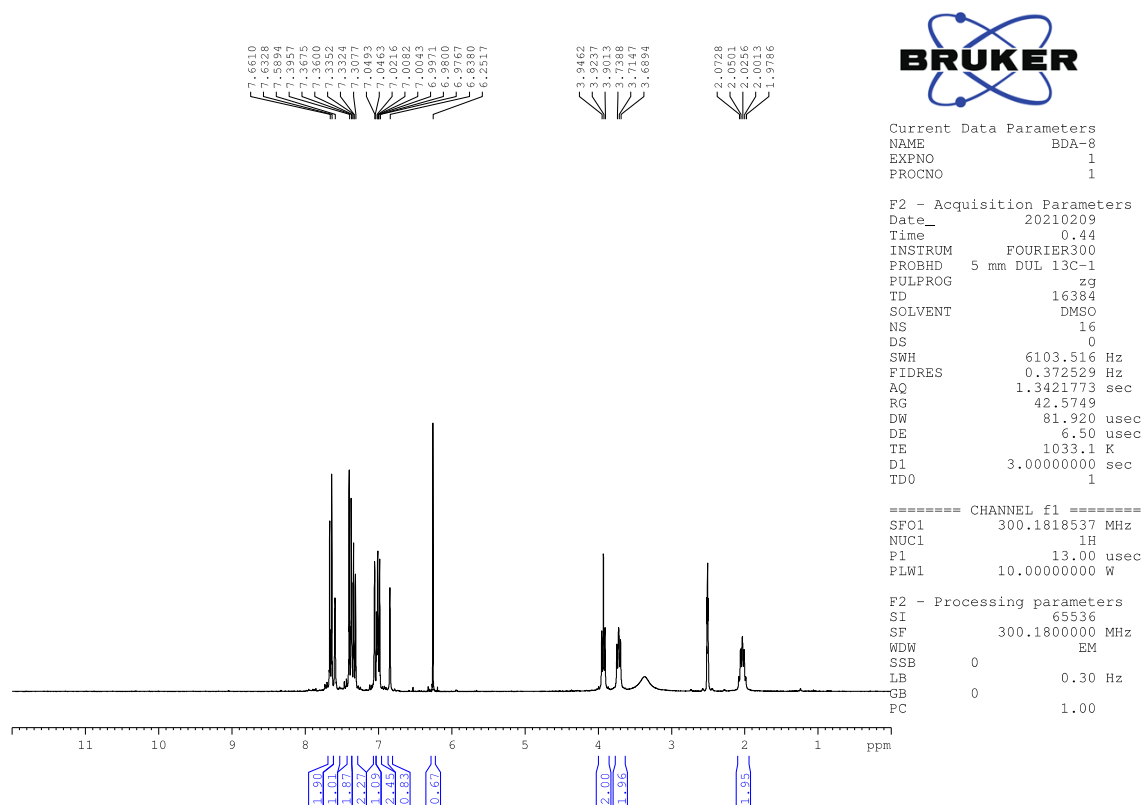

Figure S25.  $^1\text{H}$ -NMR spectrum of compound **2g**

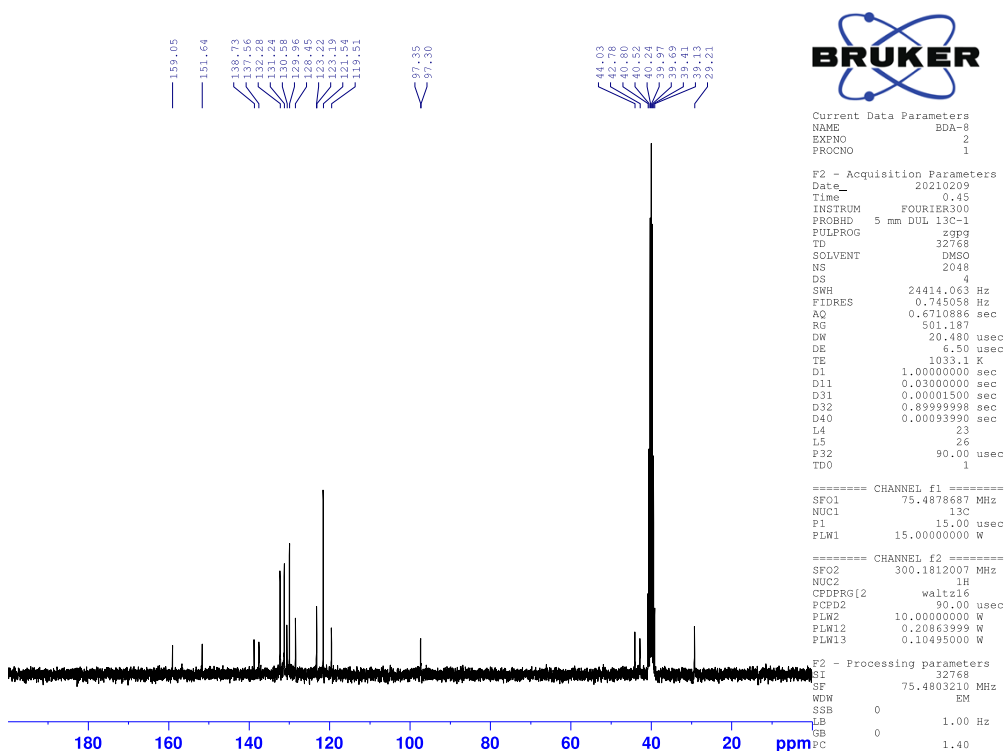

Figure S26.  $^{13}\text{C}$ -NMR spectrum of compound **2g**

Data File: C:\LabSolutions\Data\Analiz\derya\BDA-8\_50.lcd

| Elmt | Val. | Min | Max | Use Adduct |
|------|------|-----|-----|------|------|-----|-----|------|------|-----|-----|------|------|-----|-----|------------|
| H    | 1    | 5   | 40  | O    | 2    | 0   | 3   | S    | 2    | 1   | 1   | Ru   | 2    | 0   | 0   | H          |
| C    | 4    | 5   | 35  | F    | 1    | 0   | 0   | Cl   | 1    | 0   | 0   | Pd   | 2    | 0   | 0   |            |
| N    | 3    | 0   | 5   | P    | 3    | 0   | 0   | Br   | 1    | 1   | 1   | I    | 3    | 0   | 0   |            |

Error Margin (ppm): 5

DBE Range: 0.0 - 25.0

Electron Ions: both

HC Ratio: unlimited

Apply N Rule: yes

Use MSn Info: yes

Max Isotopes: 3

Isotope RI (%): 1.00

Isotope Res: 9000

MSn Iso RI (%): 10.00

MSn Logic Mode: AND

Max Results: 150

Event#: 1 MS(E+) Ret. Time : 2.507 Scan# : 377

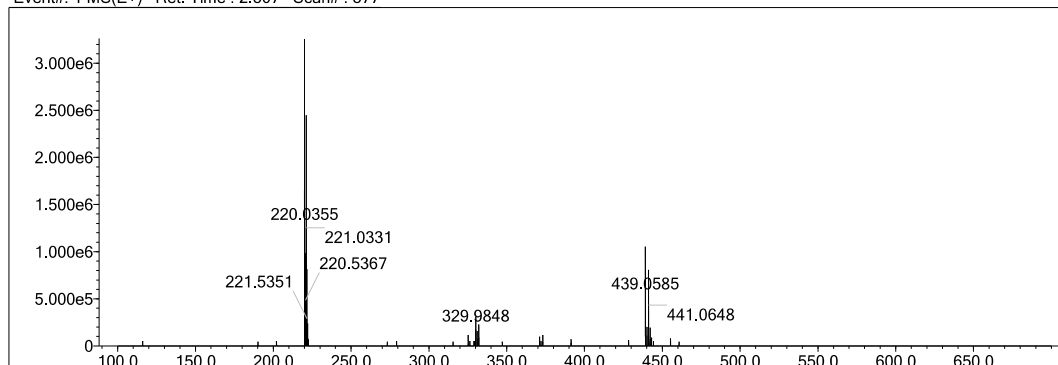

Measured region for 439.0585 m/z

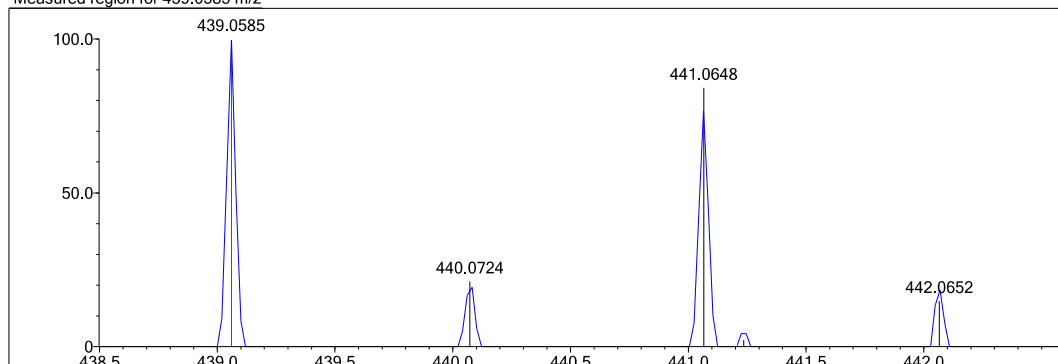

C21 H19 N4 S Br [M+H]+ : Predicted region for 439.0587 m/z

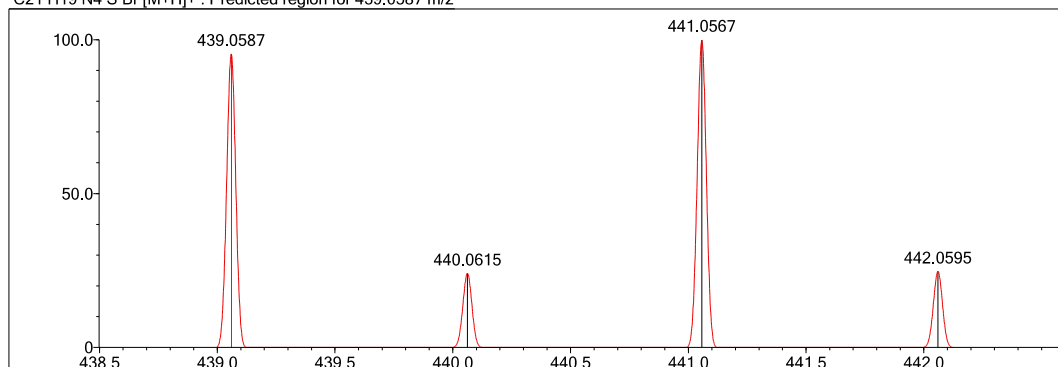

| Rank | Score | Formula (M)     | Ion                | Meas. m/z | Pred. m/z | Df. (mDa) | Df. (ppm) | Iso   | DBE  |
|------|-------|-----------------|--------------------|-----------|-----------|-----------|-----------|-------|------|
| 1    | 26.78 | C21 H19 N4 S Br | [M+H] <sup>+</sup> | 439.0585  | 439.0587  | -0.2      | -0.46     | 26.78 | 14.0 |

Figure S27. HRMS report of compound 2g

==== Shimadzu LCMSsolution Analysis Report ====

Acquired by : Admin  
Sample Name : BDA-8  
Sample ID :  
Vial # : 73  
Injection Volume : 0.5 uL  
Data File Name : BDA-8\_6.lcd  
Method File Name : isocratic\_serkan15DKBETÜL.lcm  
Batch File Name : batch.lcb  
Report File Name : DefaultLCMS.lcr  
Data Acquired : 10.08.2023 11:04:03  
Data Processed : 10.08.2023 11:49:28

<Chromatogram>

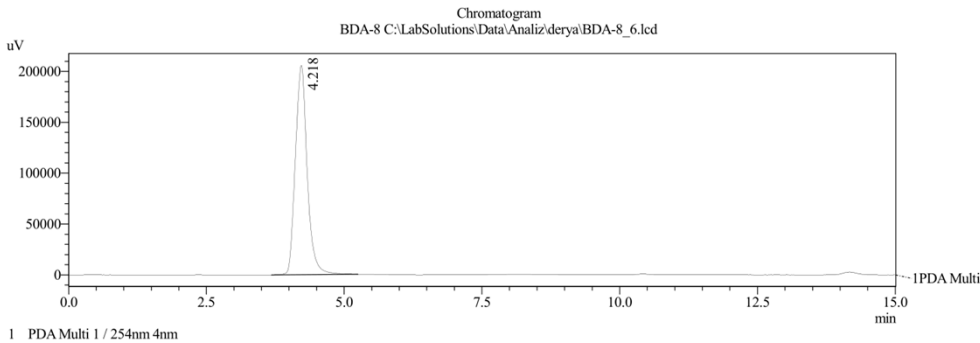

PDA Ch1 254nm 4nm

| PeakTable |           |         |        |         |          |
|-----------|-----------|---------|--------|---------|----------|
| Peak#     | Ret. Time | Area    | Height | Area %  | Height % |
| 1         | 4.218     | 3074897 | 205830 | 100.000 | 100.000  |
| Total     |           | 3074897 | 205830 | 100.000 | 100.000  |

C:\LabSolutions\Data\Analiz\derya\BDA-8\_6.lcd

Figure S28. HPLC report of compound 2g

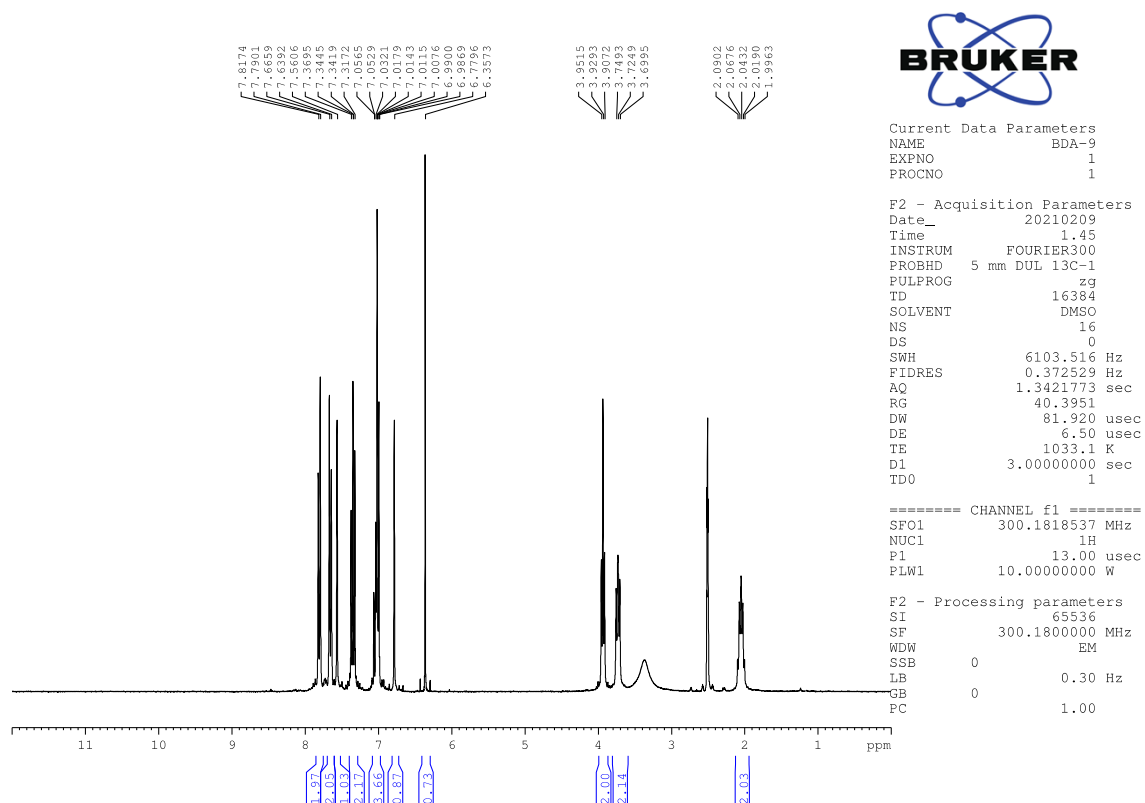

Figure S29.  $^1\text{H}$ -NMR spectrum of compound **2h**

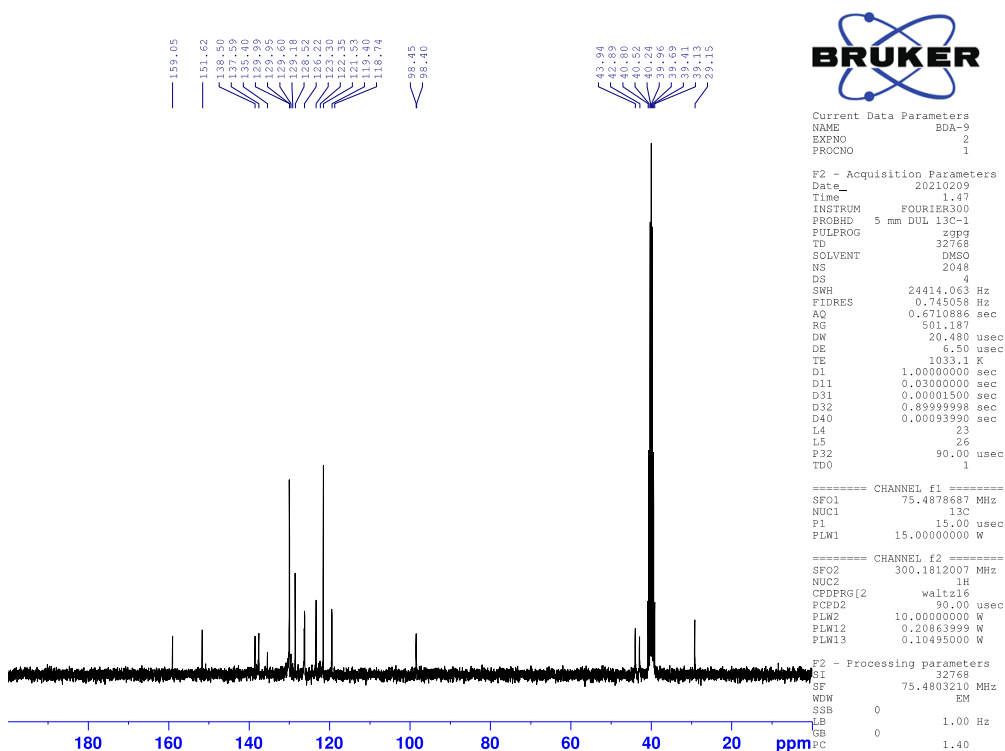

Figure S30.  $^{13}\text{C}$ -NMR spectrum of compound **2h**

Data File: C:\LabSolutions\Data\Analiz\derya\BDA-9\_51.lcd

| Elmt | Val. | Min | Max | Use Adduct |
|------|------|-----|-----|------|------|-----|-----|------|------|-----|-----|------|------|-----|-----|------------|
| H    | 1    | 5   | 40  | O    | 2    | 0   | 3   | S    | 2    | 1   | 1   | Ru   | 2    | 0   | 0   | H          |
| C    | 4    | 5   | 35  | F    | 1    | 3   | 3   | Cl   | 1    | 0   | 0   | Pd   | 2    | 0   | 0   |            |
| N    | 3    | 0   | 5   | P    | 3    | 0   | 0   | Br   | 1    | 0   | 0   | I    | 3    | 0   | 0   |            |

Error Margin (ppm): 5

DBE Range: 0.0 - 25.0

Electron Ions: both

HC Ratio: unlimited

Apply N Rule: yes

Use MSn Info: yes

Max Isotopes: 3

Isotope RI (%): 1.00

Isotope Res: 9000

MSn Iso RI (%): 10.00

MSn Logic Mode: AND

Max Results: 150

Event#: 1 MS(E+) Ret. Time : 3.013 Scan# : 453

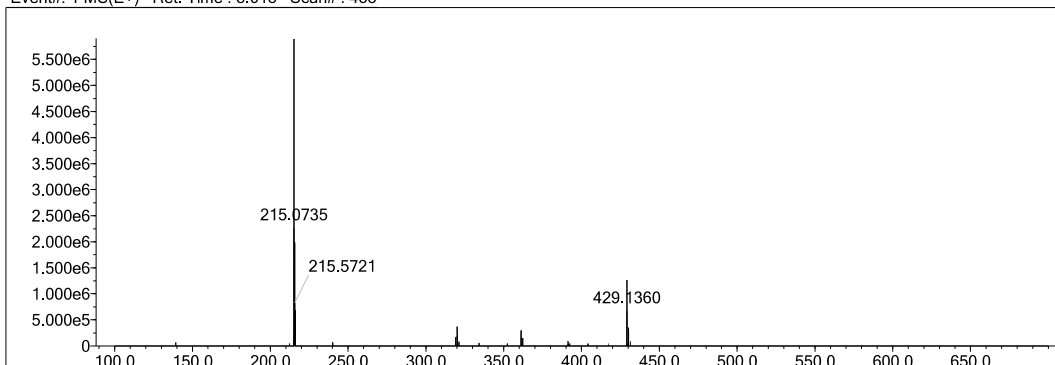

Measured region for 429.1360 m/z

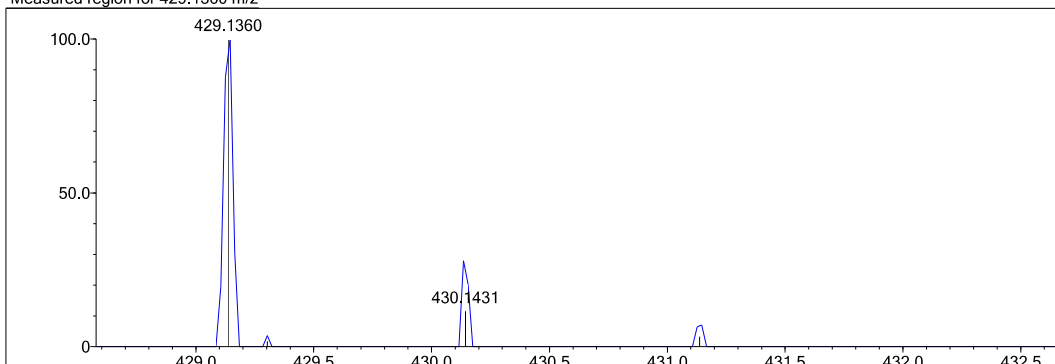

C22 H19 N4 F3 S [M+H]+ : Predicted region for 429.1355 m/z

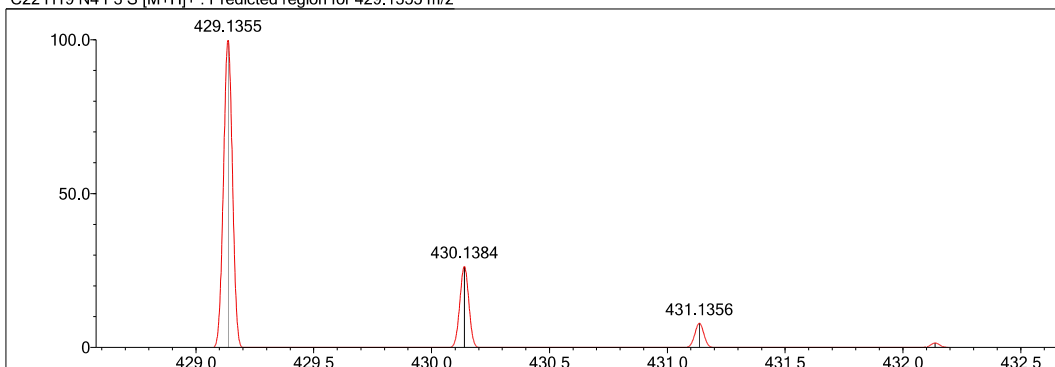

| Rank | Score | Formula (M)     | Ion    | Meas. m/z | Pred. m/z | Df. (mDa) | Df. (ppm) | Iso   | DBE  |
|------|-------|-----------------|--------|-----------|-----------|-----------|-----------|-------|------|
| 1    | 80.23 | C22 H19 N4 F3 S | [M+H]+ | 429.1360  | 429.1355  | 0.5       | 1.17      | 80.57 | 14.0 |

Figure S31. HRMS report of compound 2h



# ==== Shimadzu LCMSsolution Analysis Report ====

Acquired by : Admin  
 Sample Name : BDA-9  
 Sample ID :  
 Vial # : 74  
 Injection Volume : 0.5 uL  
 Data File Name : BDA-9\_7.lcd  
 Method File Name : isocratic\_serkan15DKBETÜL.lcm  
 Batch File Name : batch.lcb  
 Report File Name : DefaultLCMS.lcr  
 Data Acquired : 10.08.2023 11:19:32  
 Data Processed : 10.08.2023 11:50:10

## <Chromatogram>

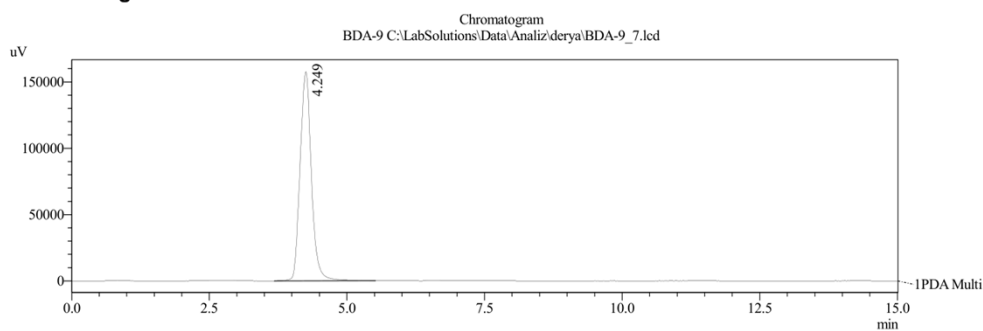

PeakTable

PDA Ch1 254nm 4nm

| Peak# | Ret. Time | Area    | Height | Area %  | Height % |
|-------|-----------|---------|--------|---------|----------|
| 1     | 4.249     | 2258640 | 157774 | 100.000 | 100.000  |
| Total |           | 2258640 | 157774 | 100.000 | 100.000  |

C:\LabSolutions\Data\Analiz\derya\BDA-9\_7.lcd

**Figure S32.** HPLC report of compound **2h**
